# Supplementary material for: Plasmatic MicroRNAs and Treatment Outcomes of Patients with Metastatic Castration-Resistant Prostate Cancer: A Hospital-Based Cohort Study and In Silico Analysis
Source: MDPI journal article supplement (doi:10.3390/ijms24109101), 2023-05-22
Supplement: s1 [file s1]

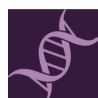

## Supplementary Materials

**Table S1.** Association of miRNAs expression levels with demographic and clinicopathological factors of mCRPC patients.

| Demographic or<br>clinicopathological factors | N                   | Hsa-miR-16-5p   |                |                 | N  | Hsa-miR-20a-5p  |                |                 | N  | Hsa-miR-34a-5p |                |                 |
|-----------------------------------------------|---------------------|-----------------|----------------|-----------------|----|-----------------|----------------|-----------------|----|----------------|----------------|-----------------|
|                                               |                     | Low<br>levels   | High<br>levels | <i>p</i> -Value |    | Low<br>levels   | High<br>levels | <i>p</i> -Value |    | Low<br>levels  | High<br>levels | <i>p</i> -Value |
| Age at disease diagnosis,<br>years            | <64 32              | 14              | 18             | 0.966           | 36 | 15              | 21             | 0.975           | 37 | 15             | 22             | 0.252           |
|                                               | >=64 36             | 17              | 19             |                 | 38 | 17              | 21             |                 | 41 | 23             | 18             |                 |
| Initial PSA, ng/mL                            | <=20 32             | 15              | 17             | 1.000           | 35 | 18              | 17             | 0.456           | 37 | 18             | 19             | 0.770           |
|                                               | >20 24              | 11              | 13             |                 | 26 | 10              | 16             |                 | 27 | 15             | 22             |                 |
| Gleason                                       | <8 35               | 18              | 17             | 0.502           | 36 | 16              | 20             | 0.972           | 36 | 20             | 16             | 0.355           |
|                                               | >=8 30              | 12              | 18             |                 | 34 | 14              | 20             |                 | 38 | 16             | 22             |                 |
| Metastasis at diagnosis                       | No 51               | 24              | 27             | 0.888           | 56 | 24              | 32             | 1.000           | 58 | 30             | 28             | 0.519           |
|                                               | Yes 17              | 7               | 10             |                 | 18 | 8               | 10             |                 | 20 | 8              | 12             |                 |
| Indication for ARAT agent                     | Before docetaxel 43 | 22              | 21             | 0.338           | 48 | 24              | 24             | 0.178           | 52 | 26             | 26             | 0.936           |
|                                               | After docetaxel 25  | 9               | 16             |                 | 26 | 8               | 18             |                 | 26 | 12             | 14             |                 |
| Age at ARAT agent<br>initiation               | <76 34              | 12              | 22             | 0.144           | 37 | 15              | 22             | 0.814           | 39 | 15             | 24             | 0.113           |
|                                               | >=76 34             | 19              | 15             |                 | 37 | 17              | 20             |                 | 39 | 23             | 16             |                 |
| ARAT agent                                    | AbA 26              | 12              | 14             | 1.000           | 27 | 13              | 14             | 0.688           | 28 | 16             | 12             | 0.380           |
|                                               | ENZ 42              | 19              | 23             |                 | 47 | 19              | 28             |                 | 50 | 22             | 28             |                 |
| ECOG at ARAT agent<br>initiation              | 0 and 1 64          | 29              | 35             | 1.000           | 68 | 30              | 38             | 0.935           | 72 | 33             | 39             | 0.180           |
|                                               | 2 4                 | 2               | 2              |                 | 6  | 2               | 4              |                 | 6  | 5              | 1              |                 |
|                                               |                     | Hsa-miR-125b-5p |                |                 |    | Hsa-miR-130b-3p |                |                 |    | Hsa-miR-145-5p |                |                 |
|                                               | N                   | Low<br>levels   | High<br>levels | <i>p</i> -Value | N  | Low<br>levels   | High<br>levels | <i>p</i> -Value | N  | Low<br>levels  | High<br>levels | <i>p</i> -Value |
| Age at disease diagnosis,<br>years            | <64 37              | 14              | 23             | 0.924           | 32 | 11              | 21             | 0.978           | 35 | 9              | 26             | 0.584           |
|                                               | >=64 41             | 17              | 24             |                 | 40 | 15              | 25             |                 | 41 | 14             | 27             |                 |
| Initial PSA, ng/mL                            | <=20 37             | 15              | 22             | 0.726           | 33 | 15              | 18             | 0.196           | 36 | 11             | 25             | 1.000           |
|                                               | >20 27              | 13              | 14             |                 | 27 | 7               | 20             |                 | 27 | 8              | 19             |                 |
| Gleason                                       | <8 36               | 16              | 20             | 0.507           | 34 | 12              | 22             | 0.877           | 36 | 10             | 26             | 0.499           |
|                                               | >=8 38              | 13              | 25             |                 | 35 | 14              | 21             |                 | 37 | 13             | 24             |                 |
| Metastasis at diagnosis                       | No 58               | 23              | 35             | 1.000           | 52 | 20              | 32             | 0.692           | 56 | 17             | 39             | 1.000           |
|                                               | Yes 20              | 8               | 12             |                 | 20 | 6               | 14             |                 | 20 | 6              | 14             |                 |
| Indication for ARAT agent                     | Before docetaxel 52 | 25              | 27             | 0.060           | 48 | 18              | 30             | 0.931           | 50 | 17             | 33             | 0.471           |
|                                               | After docetaxel 26  | 6               | 20             |                 | 24 | 8               | 16             |                 | 26 | 6              | 20             |                 |

|                                 |                  |    |            |             |         |                |            |             |         |    |                 |             |         |  |
|---------------------------------|------------------|----|------------|-------------|---------|----------------|------------|-------------|---------|----|-----------------|-------------|---------|--|
| Age at ARAT agent initiation    |                  |    |            |             |         |                |            |             |         |    |                 |             |         |  |
|                                 | <76              | 39 | 14         | 25          | 0.644   | 35             | 13         | 22          | 1.000   | 38 | 7               | 31          | 0.046   |  |
|                                 | >=76             | 39 | 17         | 22          |         | 37             | 13         | 24          |         | 38 | 16              | 22          |         |  |
| ARAT agent                      |                  |    |            |             |         |                |            |             |         |    |                 |             |         |  |
|                                 | AbA              | 28 | 12         | 16          | 0.858   | 25             | 8          | 17          | 0.786   | 27 | 10              | 17          | 0.488   |  |
|                                 | ENZ              | 50 | 19         | 31          |         | 47             | 18         | 29          |         | 49 | 13              | 36          |         |  |
| ECOG at ARAT agent initiation   |                  |    |            |             |         |                |            |             |         |    |                 |             |         |  |
|                                 | 0 and 1          | 72 | 26         | 46          | 0.066   | 68             | 26         | 42          | 0.312   | 71 | 23              | 48          | 0.308   |  |
|                                 | 2                | 6  | 5          | 1           |         | 4              | 0          | 4           |         | 5  | 0               | 5           |         |  |
|                                 | Hsa-miR-150-5p   |    |            |             |         | Hsa-miR-155-5p |            |             |         |    | Hsa-miR-320a-3p |             |         |  |
|                                 |                  | N  | Low levels | High levels | p-Value | N              | Low levels | High levels | p-Value | N  | Low levels      | High levels | p-Value |  |
| Age at disease diagnosis, years |                  |    |            |             |         |                |            |             |         |    |                 |             |         |  |
|                                 | <64              | 36 | 19         | 17          | 0.254   | 35             | 16         | 19          | 0.693   | 34 | 8               | 26          | 0.902   |  |
|                                 | >=64             | 38 | 26         | 12          |         | 39             | 15         | 24          |         | 40 | 11              | 29          |         |  |
| Initial PSA, ng/mL              |                  |    |            |             |         |                |            |             |         |    |                 |             |         |  |
|                                 | <=20             | 35 | 23         | 12          | 0.501   | 35             | 18         | 17          | 0.540   | 35 | 9               | 26          | 0.790   |  |
|                                 | >20              | 26 | 14         | 12          |         | 25             | 10         | 15          |         | 27 | 9               | 18          |         |  |
| Gleason                         |                  |    |            |             |         |                |            |             |         |    |                 |             |         |  |
|                                 | <8               | 34 | 20         | 14          | 0.850   | 36             | 16         | 20          | 0.972   | 35 | 9               | 26          | 1.000   |  |
|                                 | >=8              | 36 | 23         | 13          |         | 34             | 14         | 20          |         | 36 | 10              | 26          |         |  |
| Metastasis at diagnosis         |                  |    |            |             |         |                |            |             |         |    |                 |             |         |  |
|                                 | No               | 55 | 33         | 22          | 1.000   | 55             | 25         | 30          | 0.431   | 54 | 14              | 40          | 1.000   |  |
|                                 | Yes              | 19 | 12         | 7           |         | 19             | 6          | 13          |         | 20 | 5               | 15          |         |  |
| Indication for ARAT agent       |                  |    |            |             |         |                |            |             |         |    |                 |             |         |  |
|                                 | Before docetaxel | 48 | 29         | 19          | 1.000   | 49             | 22         | 27          | 0.628   | 49 | 13              | 36          | 1.000   |  |
|                                 | After docetaxel  | 26 | 16         | 10          |         | 25             | 9          | 16          |         | 25 | 6               | 19          |         |  |
| Age at ARAT agent initiation    |                  |    |            |             |         |                |            |             |         |    |                 |             |         |  |
|                                 | <76              | 38 | 19         | 19          | 0.086   | 36             | 14         | 22          | 0.784   | 37 | 9               | 28          | 1.000   |  |
|                                 | >=76             | 36 | 26         | 10          |         | 38             | 17         | 21          |         | 37 | 10              | 27          |         |  |
| ARAT agent                      |                  |    |            |             |         |                |            |             |         |    |                 |             |         |  |
|                                 | AbA              | 25 | 18         | 7           | 0.247   | 28             | 12         | 16          | 1.000   | 25 | 7               | 18          | 0.964   |  |
|                                 | ENZ              | 49 | 27         | 22          |         | 46             | 19         | 27          |         | 49 | 12              | 37          |         |  |
| ECOG at ARAT agent initiation   |                  |    |            |             |         |                |            |             |         |    |                 |             |         |  |
|                                 | 0 and 1          | 68 | 40         | 28          | 0.458   | 69             | 29         | 40          | 1.000   | 69 | 18              | 51          | 1.000   |  |
|                                 | 2                | 6  | 5          | 1           |         | 5              | 2          | 3           |         | 5  | 1               | 4           |         |  |

AbA, Abiraterone acetate; ARAT, Second-generation androgen receptor axis-targeted agent; ECOG, Eastern Cooperative Oncology Group; ENZ, Enzalutamide; PSA, Prostate- specific antigen.

**Table S2.** Strong validated microRNA targets retrieved from miRTargetLink 2.0 database.

| Hsa-miR-16-5p  |            | Hsa-miR-145-5p |            | Hsa-miR-20a-5p |            |
|----------------|------------|----------------|------------|----------------|------------|
| Target         | Source     | Target         | Source     | Target         | Source     |
| BMI1           | MIRT000266 | ABCC1          | MIRT706010 | HIF1A          | MIRT000002 |
| HMGA1          | MIRT000270 | ABHD17C        | MIRT021539 | TCEAL1         | MIRT000178 |
| ACVR2A         | MIRT000536 | ABRACL         | MIRT021534 | <b>CCND1</b>   | MIRT000179 |
| <b>CDK6</b>    | MIRT000939 | ADAM17         | MIRT007275 | E2F1           | MIRT000180 |
| CCND3          | MIRT000940 | ADD3           | MIRT437436 | BMPR2          | MIRT000181 |
| PURA           | MIRT001425 | AKR1B10        | MIRT021503 | <b>CDKN1A</b>  | MIRT000597 |
| <b>CCND1</b>   | MIRT001225 | ALDH3A1        | MIRT021523 | <b>TGFB2</b>   | MIRT001785 |
| CCNE1          | MIRT001226 | ALPL2          | MIRT021509 | RUNX1          | MIRT003742 |
| FGF2           | MIRT001468 | ANGPT2         | MIRT438013 | MAP3K12        | MIRT003010 |
| PTGS2          | MIRT001426 | AP1G1          | MIRT021529 | BCL2           | MIRT003011 |
| ARL2           | MIRT001478 | APH1A          | MIRT021538 | MEF2D          | MIRT003012 |
| ARHGDI1A       | MIRT001479 | ARF6           | MIRT278608 | PTEN           | MIRT003369 |
| BCL2           | MIRT001800 | ARL6IP5        | MIRT021502 | APP            | MIRT003382 |
| WNT3A          | MIRT003430 | BNIP3          | MIRT000305 | <b>VEGFA</b>   | MIRT004450 |
| BRCA1          | MIRT003328 | BRAF           | MIRT053219 | BCL2L11        | MIRT004570 |
| AKT3           | MIRT003329 | C1orf65        | MIRT021504 | MYC            | MIRT005289 |
| <b>CCND2</b>   | MIRT003431 | CAMK1D         | MIRT733960 | IRF2           | MIRT006178 |
| CADM1          | MIRT004382 | CBFB           | MIRT000676 | BNIP2          | MIRT005481 |
| <b>VEGFA</b>   | MIRT003890 | CCDC43         | MIRT021517 | SMAD4          | MIRT005631 |
| MYB            | MIRT004637 | CD28           | MIRT438542 | <b>CCND2</b>   | MIRT005854 |
| TPPP3          | MIRT004470 | CD40           | MIRT734755 | RB1            | MIRT005857 |
| CAPRIN1        | MIRT005086 | CD44           | MIRT053216 | RBL1           | MIRT005858 |
| PPM1D          | MIRT005360 | CDH2           | MIRT007288 | RBL2           | MIRT005859 |
| KDR            | MIRT006794 | CDK4           | MIRT005879 | WEE1           | MIRT005860 |
| CHUK           | MIRT005554 | <b>CDK6</b>    | MIRT054379 | KIT            | MIRT006180 |
| TP53           | MIRT005764 | CDKN1A         | MIRT000575 | PPARG          | MIRT006754 |
| ZYX            | MIRT006534 | CEP19          | MIRT021514 | EGLN3          | MIRT006289 |
| NCOR2          | MIRT006651 | CFTR           | MIRT438886 | BAMBI          | MIRT006755 |
| AXIN2          | MIRT006751 | CLINT1         | MIRT000678 | CRIM1          | MIRT006756 |
| FGFR1          | MIRT006795 | COL5A1         | MIRT053211 | MAP2K3         | MIRT006772 |
| <b>HMGA2</b>   | MIRT006804 | CRNDE          | MIRT734326 | PURA           | MIRT007002 |
| PIM1           | MIRT006870 | CTGF           | MIRT007247 | SIRPA          | MIRT035531 |
| UNG            | MIRT007301 | CTNND1         | MIRT053657 | ARHGAP12       | MIRT031082 |
| IFNG           | MIRT006912 | DDC            | MIRT437834 | TSG101         | MIRT031083 |
| <b>RPS6KB1</b> | MIRT031441 | DDX17          | MIRT006903 | STAT3          | MIRT050559 |
| RECK           | MIRT031373 | DDX6           | MIRT241310 | LIMK1          | MIRT052914 |
| PRDM4          | MIRT031524 | DFFA           | MIRT004580 | UBE2C          | MIRT050549 |
| MTOR           | MIRT031485 | DTD1           | MIRT021511 | GJA1           | MIRT053007 |
| MAP7           | MIRT031639 | E2F3           | MIRT438350 | PHLPP2         | MIRT052971 |
| WEE1           | MIRT031934 | EGFR           | MIRT003325 | DUSP2          | MIRT053023 |
| APP            | MIRT031838 | EIF4E          | MIRT005878 | MAP3K5         | MIRT053208 |
| SOX6           | MIRT052901 | EPAS1          | MIRT053030 | ITGB8          | MIRT053109 |
| CDS2           | MIRT032053 | ERG            | MIRT007094 | EGR2           | MIRT053563 |
| RAF1           | MIRT053089 | ESR1           | MIRT006774 | SMAD7          | MIRT053159 |
| KRAS           | MIRT053090 | ETS1           | MIRT053038 | TP53INP1       | MIRT053505 |
| SLC6A4         | MIRT053620 | F11R           | MIRT021501 | ABL2           | MIRT054860 |

|              |            |              |            |         |            |
|--------------|------------|--------------|------------|---------|------------|
| <b>IGF1R</b> | MIRT053088 | FAM3C        | MIRT021525 | MCL1    | MIRT053332 |
| BDNF         | MIRT437463 | FAM45A       | MIRT021527 | ZFYVE9  | MIRT071903 |
| YAP1         | MIRT054284 | FLI1         | MIRT004496 | REST    | MIRT213203 |
| SOX5         | MIRT054896 | FSCN1        | MIRT003543 | ATG16L1 | MIRT087604 |
| BIRC5        | MIRT054909 | FXN          | MIRT734230 | ANKH    | MIRT095719 |
| CHEK1        | MIRT265077 | GMFB         | MIRT021506 | PRKG1   | MIRT437765 |
| RICTOR       | MIRT437349 | GOLM1        | MIRT021516 | ETV1    | MIRT438054 |
| HDGF         | MIRT438686 | HDAC11       | MIRT438718 | RGS5    | MIRT437944 |
| BACE1        | MIRT732050 | HDAC2        | MIRT007307 | FBXO31  | MIRT438351 |
| WNT4         | MIRT438738 | HLTF         | MIRT021505 | DNMT1   | MIRT438806 |
| NCSTN        | MIRT732051 | <b>HMGA2</b> | MIRT437833 | EPAS1   | MIRT438160 |
| IL12B        | MIRT732755 | IFNB1        | MIRT004616 | PKD1    | MIRT438812 |
| OPRM1        | MIRT732142 | <b>IGF1R</b> | MIRT004931 | RUNX3   | MIRT561650 |
| ADORA2A      | MIRT733031 | ILK          | MIRT007180 | PKNOX1  | MIRT513751 |
| CLDN2        | MIRT735443 | IRS1         | MIRT000731 | KIF26B  | MIRT732249 |
| HGF          | MIRT733537 | IRS2         | MIRT006332 | RB1CC1  | MIRT731268 |
| SOCS3        | MIRT733215 | ITGB8        | MIRT006494 | NFKBIB  | MIRT731837 |
| METTL3       | MIRT733916 | JADE1        | MIRT021530 | TGFBR1  | MIRT734034 |
| UCA1         | MIRT734797 | KLF4         | MIRT000308 | TIMP2   | MIRT732435 |
| GLS2         | MIRT734798 | KLF5         | MIRT000306 | PTPRO   | MIRT734853 |
|              |            | KREMEN1      | MIRT021532 | PPP2R2A | MIRT734854 |
|              |            | LYPLA2       | MIRT021526 | DAPK3   | MIRT735333 |
|              |            | MAP2K6       | MIRT021513 |         |            |
|              |            | MCM2         | MIRT732469 |         |            |
|              |            | MDM2         | MIRT007257 |         |            |
|              |            | MEST         | MIRT021508 |         |            |
|              |            | MIXL1        | MIRT021535 |         |            |
|              |            | MMP1         | MIRT021518 |         |            |
|              |            | MMP12        | MIRT021521 |         |            |
|              |            | MMP14        | MIRT021533 |         |            |
|              |            | MSH3         | MIRT734568 |         |            |
|              |            | MTDH         | MIRT733264 |         |            |
|              |            | MTMR14       | MIRT021522 |         |            |
|              |            | MUC1         | MIRT000426 |         |            |
|              |            | <b>MYC</b>   | MIRT004290 |         |            |
|              |            | MYO5A        | MIRT035535 |         |            |
|              |            | MYO6         | MIRT000457 |         |            |
|              |            | MYOCD        | MIRT733241 |         |            |
|              |            | NAIP         | MIRT731786 |         |            |
|              |            | NANOG        | MIRT035522 |         |            |
|              |            | NDRG2        | MIRT021510 |         |            |
|              |            | NDUFA4       | MIRT021524 |         |            |
|              |            | NEDD9        | MIRT006889 |         |            |
|              |            | NFATC1       | MIRT438543 |         |            |
|              |            | NIPSNAP1     | MIRT021531 |         |            |
|              |            | NRAS         | MIRT007107 |         |            |
|              |            | NUDT1        | MIRT006788 |         |            |
|              |            | PAK4         | MIRT006899 |         |            |
|              |            | PARP8        | MIRT000732 |         |            |

|                |            |
|----------------|------------|
| PIGF           | MIRT021528 |
| PODXL          | MIRT021537 |
| POU5F1         | MIRT004904 |
| PPP3CA         | MIRT000677 |
| PTP4A2         | MIRT021519 |
| PXN            | MIRT734440 |
| ROBO2          | MIRT005809 |
| ROCK1          | MIRT438282 |
| RPA1           | MIRT732468 |
| <b>RPS6KB1</b> | MIRT438496 |
| RREB1          | MIRT053081 |
| RTKN           | MIRT021499 |
| SENP1          | MIRT731217 |
| SERINC5        | MIRT021507 |
| SERPINE1       | MIRT006317 |
| SET            | MIRT732467 |
| SMAD2          | MIRT735099 |
| SMAD3          | MIRT053650 |
| SOCS7          | MIRT007248 |
| SOX2           | MIRT000307 |
| SOX9           | MIRT053648 |
| SP1            | MIRT053757 |
| SP7            | MIRT438643 |
| SPTBN1         | MIRT731094 |
| SPTLC1         | MIRT732470 |
| SRGAP1         | MIRT005810 |
| STAT1          | MIRT000626 |
| SWAP70         | MIRT006747 |
| TGFB2          | MIRT735095 |
| TGFBR2         | MIRT053652 |
| TIRAP          | MIRT004748 |
| TMEM9B         | MIRT021520 |
| TNFSF13        | MIRT054274 |
| TPM3           | MIRT021512 |
| TPRG1          | MIRT021515 |
| TSPAN6         | MIRT021536 |
| TUG1           | MIRT733664 |
| <b>VEGFA</b>   | MIRT006215 |
| VPS51          | MIRT735489 |
| YES1           | MIRT000627 |

Bold targets are the ones shared by at least two microRNAs.
